# Supplementary material
Source: publisher site journal article supplement (https://www.spandidos-publications.com/2284/downloadSupplementary)
Supplement: Supplementary file 1 [file downloadSupplementary]

## Sheet: Sheet1
Table SX. miRNA enrichment degree from the mesenchymal stem cell treatment group.
hsa-miR-92b-3p	up	162
hsa-miR-7704	up	160
hsa-miR-762	up	119
hsa-miR-7-5p	up	114
hsa-miR-7150	down	112
hsa-miR-6510-5p	down	108
hsa-miR-4734	up	73
hsa-miR-4690-5p	down	70
hsa-miR-4443	up	62
hsa-miR-4267	up	61
hsa-miR-374b-5p	down	56
hsa-miR-30c-5p	down	47
hsa-miR-27b-3p	down	36
hsa-miR-22-3p	up	33
hsa-miR-17-5p	up	31
hsa-miR-150-5p	up	17
hsa-miR-149-3p	down	15
hsa-miR-146a-5p	down	11
hsa-miR-142-5p	down	9
hsa-miR-106a-5p	up	6
hsa-miR-1246	down	6
hsa-let-7i-5p	down	4
hsa-let-7a-5p	down	1
miR/miRNA, microRNA.
